# Supplementary material
Source: ML conference proceedings conference paper supplement (https://proceedings.neurips.cc/paper_files/paper/2010/hash/c73dfe6c630edb4c1692db67c510f65c-Abstract.html)
Supplement: Supplementary file 1 [file c73dfe6c630edb4c1692db67c510f65c-Supplemental.zip]

Archive with 1 entries (1 files):
- extra/NIPS2010_1348_extra.pdf
